# Supplementary material
Source: PubMed Central journal article supplement (PMC3639697)
Supplement: JCI67816sd.pdf [file JCI67816sd.pdf]

**Supplemental Figure 1. MERTK gene expression in melanoma cell line panel from Cancer Cell Line Encyclopedia.** A. Microarray analysis of melanoma cell lines from UNC collection grouped by oncogenic mutation. (ns=not significant) B. Microarray analysis of normal human skin and melanoma cell lines from CCLC collection for MERTK transcript levels. Melanoma cell lines were grouped by oncogenic mutation status. Dotted line represents average MERTK expression in normal skin. C. CCLC collection was analyzed for MERTK expression with respect to oncogenic mutations in RAS and BRAF.

**A**

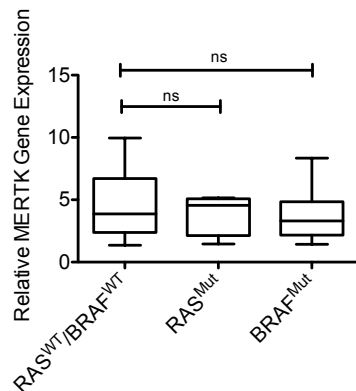

**B**

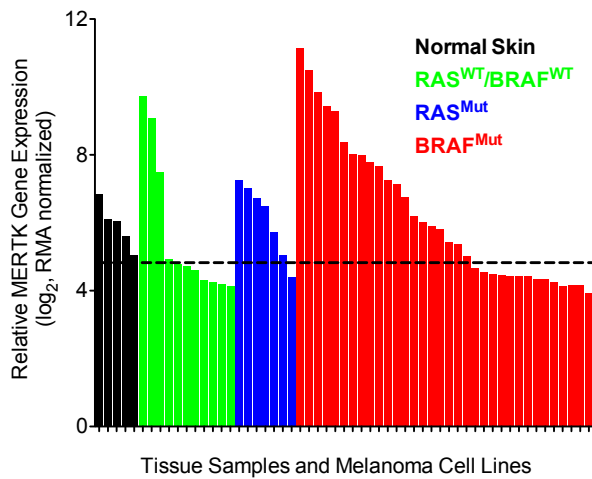

**C**

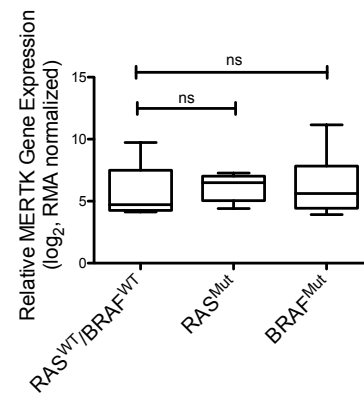



**Supplemental Figure 3. GAS6 activation of SKMEL119 and SKMEL5.** Western blot of phospho- and total STAT6, AKT and ERK. Cell cultures were stimulated with GAS6 and whole cell lysates were evaluated by western blot analysis. Actin was probed as a loading control.

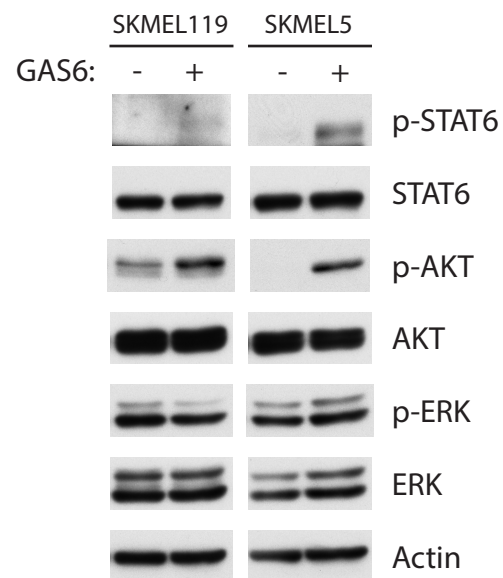

**Supplemental Figure 4. SKMEL119 MERTK knockdown cell lines and migration. A.** MERTK protein expression in SKMEL119 cell lines stably expressing shRNA against MERTK. Whole cell lysates from indicated cell lines were analyzed via western blot for MERTK protein expression. Actin was detected as a loading control. **B.** Migration of SKMEL119. Live-cell imaging of shControl and shMERTK4 cells plated on a fibronectin surface was performed for 16 hours and migration distance per unit time was determined. Mean values and standard errors were determined for 22 cells (\* $p < 0.05$ , Student's two-tailed t-test).

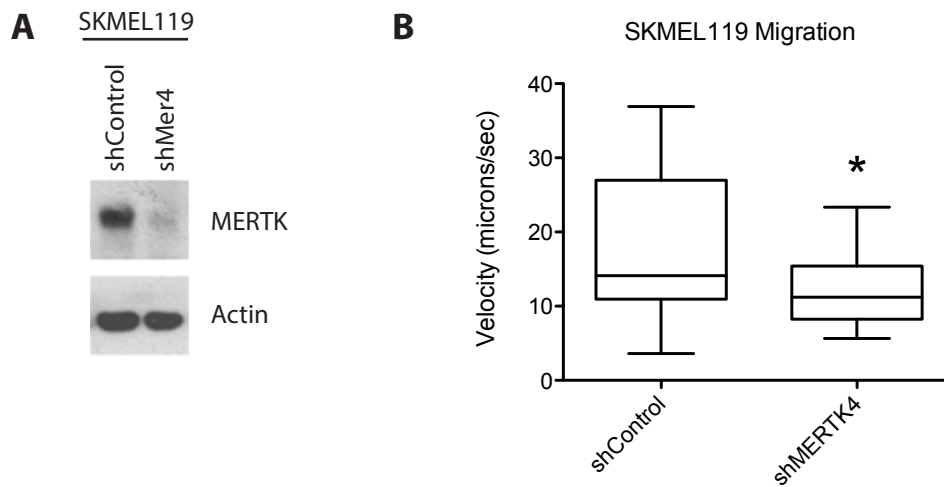

Supplementary Information

**Supplemental Table 1.** MERTK mRNA expression in patient tissues.

| <b>Tissue Category</b> | <b>Sample Description</b> | <b>Relative Expression Normalized)</b> | <b>MERTK (log<sub>2</sub>,</b> | <b>Gene RMA</b> |
|------------------------|---------------------------|----------------------------------------|--------------------------------|-----------------|
| Normal Skin            | GSM183299                 | 7.81031                                |                                |                 |
| Normal Skin            | GSM183301                 | 7.32349                                |                                |                 |
| Normal Skin            | GSM183302                 | 7.30608                                |                                |                 |
| Normal Skin            | GSM183234                 | 6.47147                                |                                |                 |
| Normal Skin            | GSM183300                 | 6.10653                                |                                |                 |
| Primary Melanoma       | GSM183235                 | 8.89009                                |                                |                 |
| Primary Melanoma       | GSM183258                 | 8.5472                                 |                                |                 |
| Primary Melanoma       | GSM183225                 | 7.89253                                |                                |                 |
| Primary Melanoma       | GSM183262                 | 7.89024                                |                                |                 |
| Primary Melanoma       | GSM183261                 | 7.86807                                |                                |                 |
| Primary Melanoma       | GSM183259                 | 7.79514                                |                                |                 |
| Primary Melanoma       | GSM183263                 | 7.36155                                |                                |                 |
| Primary Melanoma       | GSM183266                 | 7.31556                                |                                |                 |
| Primary Melanoma       | GSM183260                 | 7.2708                                 |                                |                 |
| Primary Melanoma       | GSM183304                 | 7.16972                                |                                |                 |
| Primary Melanoma       | GSM183264                 | 7.13941                                |                                |                 |
| Primary Melanoma       | GSM183303                 | 6.87686                                |                                |                 |
| Primary Melanoma       | GSM183224                 | 6.48551                                |                                |                 |
| Primary Melanoma       | GSM183265                 | 6.39586                                |                                |                 |
| Metastatic Melanoma    | GSM183281                 | 10.5761                                |                                |                 |
| Metastatic Melanoma    | GSM183255                 | 10.1251                                |                                |                 |
| Metastatic Melanoma    | GSM183276                 | 9.71227                                |                                |                 |
| Metastatic Melanoma    | GSM183292                 | 9.70506                                |                                |                 |
| Metastatic Melanoma    | GSM183282                 | 9.41463                                |                                |                 |
| Metastatic Melanoma    | GSM183274                 | 9.07661                                |                                |                 |
| Metastatic Melanoma    | GSM183295                 | 9.06875                                |                                |                 |
| Metastatic Melanoma    | GSM183297                 | 8.87435                                |                                |                 |
| Metastatic Melanoma    | GSM183285                 | 8.77834                                |                                |                 |
| Metastatic Melanoma    | GSM183290                 | 8.5476                                 |                                |                 |
| Metastatic Melanoma    | GSM183275                 | 8.53924                                |                                |                 |
| Metastatic Melanoma    | GSM183291                 | 8.52461                                |                                |                 |
| Metastatic Melanoma    | GSM183230                 | 8.45611                                |                                |                 |
| Metastatic Melanoma    | GSM183229                 | 8.24115                                |                                |                 |
| Metastatic Melanoma    | GSM183233                 | 8.23224                                |                                |                 |
| Metastatic Melanoma    | GSM183253                 | 8.2213                                 |                                |                 |
| Metastatic Melanoma    | GSM183254                 | 8.1909                                 |                                |                 |
| Metastatic Melanoma    | GSM183289                 | 8.16429                                |                                |                 |
| Metastatic Melanoma    | GSM183284                 | 8.16311                                |                                |                 |
| Metastatic Melanoma    | GSM183232                 | 7.95741                                |                                |                 |
| Metastatic Melanoma    | GSM183296                 | 7.94438                                |                                |                 |
| Metastatic Melanoma    | GSM183231                 | 7.94274                                |                                |                 |

---

|                     |           |         |
|---------------------|-----------|---------|
| Metastatic Melanoma | GSM183257 | 7.90872 |
| Metastatic Melanoma | GSM183278 | 7.90606 |
| Metastatic Melanoma | GSM183252 | 7.88016 |
| Metastatic Melanoma | GSM183256 | 7.79471 |
| Metastatic Melanoma | GSM183277 | 7.76584 |
| Metastatic Melanoma | GSM183294 | 7.75989 |
| Metastatic Melanoma | GSM183298 | 7.55289 |
| Metastatic Melanoma | GSM183286 | 7.53542 |
| Metastatic Melanoma | GSM183228 | 7.51317 |
| Metastatic Melanoma | GSM183273 | 7.47497 |
| Metastatic Melanoma | GSM183293 | 7.4459  |
| Metastatic Melanoma | GSM183287 | 7.43995 |
| Metastatic Melanoma | GSM183283 | 7.26889 |
| Metastatic Melanoma | GSM183279 | 7.24974 |
| Metastatic Melanoma | GSM183227 | 7.15013 |
| Metastatic Melanoma | GSM183280 | 6.72243 |
| Metastatic Melanoma | GSM183288 | 6.71319 |
| Metastatic Melanoma | GSM183226 | 6.47676 |

---

**Supplemental Table 2.** MERTK mRNA expression in melanoma cell lines from the UNC collection.

| <b>Mutation Status</b> | <b>Sample Description</b> | <b>Relative MERTK Gene Expression</b> |
|------------------------|---------------------------|---------------------------------------|
| NHM                    | NHM 13 PMA                | 3.6417                                |
| NHM                    | NHM 17 PMA                | 3.5485                                |
| NHM                    | NHM 11 PMA                | 3.0749                                |
| WT                     | HMCB                      | 9.9604                                |
| WT                     | WM 1232                   | 7.5040                                |
| WT                     | MALME-3                   | 7.0586                                |
| WT                     | SKMEL 88/ SKMEL 78        | 5.6401                                |
| WT                     | SKMEL 23                  | 5.6018                                |
| WT                     | PMWK                      | 4.1281                                |
| WT                     | MEL 505                   | 3.6209                                |
| WT                     | MEL 537                   | 3.6013                                |
| WT                     | SKMEL 187                 | 2.4419                                |
| WT                     | WM 1361a                  | 2.3584                                |
| WT                     | SBC 12                    | 2.0572                                |
| RAS                    | SKMEL 173                 | 5.1501                                |
| RAS                    | VMM 39                    | 5.0795                                |
| RAS                    | SKMEL 119                 | 4.8010                                |
| RAS                    | SKMEL 103                 | 4.5510                                |
| RAS                    | SKMEL 147                 | 2.5529                                |
| RAS                    | SKMEL 224                 | 2.1275                                |
| RAS                    | SKMEL 186                 | 1.4513                                |
| BRAF                   | SKMEL 27                  | 8.3464                                |
| BRAF                   | UACC 257                  | 6.6061                                |
| BRAF                   | SKMEL 239                 | 5.3333                                |
| BRAF                   | SKMEL 28                  | 5.0734                                |
| BRAF                   | A2058                     | 4.7617                                |
| BRAF                   | SKMEL 181                 | 4.4504                                |
| BRAF                   | SKMEL 100                 | 4.4352                                |
| BRAF                   | WM 2664                   | 3.4700                                |
| BRAF                   | SKMEL 190                 | 3.3711                                |
| BRAF                   | SKMEL 15                  | 3.2296                                |
| BRAF                   | WM 1158                   | 2.5297                                |
| BRAF                   | SKMEL 235                 | 2.3964                                |
| BRAF                   | WM 35                     | 2.3310                                |
| BRAF                   | A375                      | 2.1714                                |
| BRAF                   | RPMI 7951                 | 2.1681                                |
| BRAF                   | SKMEL 153                 | 1.8880                                |
| BRAF                   | SKMEL 24                  | 1.7421                                |
| BRAF                   | SKMEL 130/ SKMEL 178      | 1.3981                                |

**Supplemental Table 3.** MERTK gene expression in normal skin and melanoma cell lines from CCLE database.

| <b>Tissue Category/<br/>Mutation Status</b> | <b>Sample<br/>Description</b> | <b>Relative<br/>Expression<br/>Normalized)</b> | <b>MERTK<br/>(log<sub>2</sub>,</b> | <b>Gene<br/>RMA</b> |
|---------------------------------------------|-------------------------------|------------------------------------------------|------------------------------------|---------------------|
| Normal Skin                                 | GSM183299                     | 6.8627                                         |                                    |                     |
| Normal Skin                                 | GSM183302                     | 6.1183                                         |                                    |                     |
| Normal Skin                                 | GSM183301                     | 6.0522                                         |                                    |                     |
| Normal Skin                                 | GSM183234                     | 5.6033                                         |                                    |                     |
| Normal Skin                                 | GSM183300                     | 5.0473                                         |                                    |                     |
| WT                                          | HMCB/CHL1                     | 9.7346                                         |                                    |                     |
| WT                                          | COLO792                       | 9.0746                                         |                                    |                     |
| WT                                          | MEWO                          | 7.4973                                         |                                    |                     |
| WT                                          | HS895T                        | 4.9343                                         |                                    |                     |
| WT                                          | HS839T                        | 4.8006                                         |                                    |                     |
| WT                                          | HS600T                        | 4.7164                                         |                                    |                     |
| WT                                          | HS940T                        | 4.6128                                         |                                    |                     |
| WT                                          | HS834T                        | 4.3250                                         |                                    |                     |
| WT                                          | HS688AT                       | 4.2566                                         |                                    |                     |
| WT                                          | IPC298                        | 4.1898                                         |                                    |                     |
| WT                                          | HS934T                        | 4.1301                                         |                                    |                     |
| RAS                                         | SKMEL30                       | 7.2719                                         |                                    |                     |
| RAS                                         | HS944T                        | 7.0218                                         |                                    |                     |
| RAS                                         | HS936T                        | 6.7228                                         |                                    |                     |
| RAS                                         | CJM                           | 6.4951                                         |                                    |                     |
| RAS                                         | SKMEL2                        | 5.7292                                         |                                    |                     |
| RAS                                         | MELJUSO                       | 5.0421                                         |                                    |                     |
| RAS                                         | HS852T                        | 4.4099                                         |                                    |                     |
| BRAF                                        | SKMEL5                        | 11.1598                                        |                                    |                     |
| BRAF                                        | G361                          | 10.4933                                        |                                    |                     |
| BRAF                                        | K029AX                        | 9.8488                                         |                                    |                     |
| BRAF                                        | MALME3M                       | 9.4500                                         |                                    |                     |
| BRAF                                        | SKMEL3                        | 9.2917                                         |                                    |                     |
| BRAF                                        | UACC257                       | 8.3709                                         |                                    |                     |
| BRAF                                        | SH4                           | 8.0392                                         |                                    |                     |
| BRAF                                        | COLO829/<br>COLO849           | 7.9954                                         |                                    |                     |
| BRAF                                        | SKMEL28                       | 7.7812                                         |                                    |                     |
| BRAF                                        | IGR37                         | 7.6579                                         |                                    |                     |
| BRAF                                        | WM88                          | 7.2727                                         |                                    |                     |
| BRAF                                        | SKMEL1                        | 7.1471                                         |                                    |                     |
| BRAF                                        | COLO679                       | 6.7632                                         |                                    |                     |
| BRAF                                        | COLO741                       | 6.1969                                         |                                    |                     |
| BRAF                                        | A101D                         | 6.0241                                         |                                    |                     |
| BRAF                                        | UACC62                        | 5.8960                                         |                                    |                     |
| BRAF                                        | MELHO                         | 5.8174                                         |                                    |                     |
| BRAF                                        | COLO818/<br>COLO818/          | 5.4273                                         |                                    |                     |



---

|      |           |        |
|------|-----------|--------|
|      | COLO800   |        |
| BRAF | HT144     | 5.3742 |
| BRAF | C32       | 5.0307 |
| BRAF | A2058     | 4.6711 |
| BRAF | RPMI7951  | 4.5466 |
| BRAF | LOXIMVI   | 4.4915 |
| BRAF | WM793     | 4.4556 |
| BRAF | MDAMB435S | 4.4318 |
| BRAF | WM2664    | 4.4376 |
| BRAF | WM115     | 4.4256 |
| BRAF | WM1799    | 4.3444 |
| BRAF | WM983B    | 4.3398 |
| BRAF | COLO783   | 4.2661 |
| BRAF | A375      | 4.1476 |
| BRAF | SKMEL24   | 4.1531 |
| BRAF | HS695T    | 4.1825 |
| BRAF | IGR39     | 3.9197 |

---

**Supplemental Table 4.** Antibodies utilized for western blot.

| <b>Antibody</b> | <b>Company</b> | <b>Product Number</b> |
|-----------------|----------------|-----------------------|
| MERTK           | Epitomics/UNC  | 1633-1 / N14          |
| Actin           | Santa Cruz     | SC-1616               |
| TYRO3           | Cell Signaling | 5585                  |
| AXL             | R&D Systems    | AF154                 |
| GAPDH           | Cell Signaling | 2118                  |
| p-STAT6         | Cell Signaling | 9364                  |
| STAT6           | Cell Signaling | 9362                  |
| p-AKT           | Cell Signaling | 9271                  |
| AKT             | Cell Signaling | 9272                  |
| p-ERK           | Cell Signaling | 9106                  |
| ERK             | Cell Signaling | 9102                  |
| PARP            | Cell Signaling | 9542                  |

---
